# Supplementary material for: XRCC1 mediated the development of cervival cancer through a novel Sp1/Krox-20 swich
Source: PubMed Central journal article supplement (PMC5689679; doi:10.18632/oncotarget.21040), 2017-09-16
Supplement: oncotarget-08-86217-s001.pdf [file oncotarget-08-86217-s001.pdf]

## XRCC1 mediated the development of cervical cancer through a novel Sp1/Krox-20 switch

### SUPPLEMENTARY MATERIALS

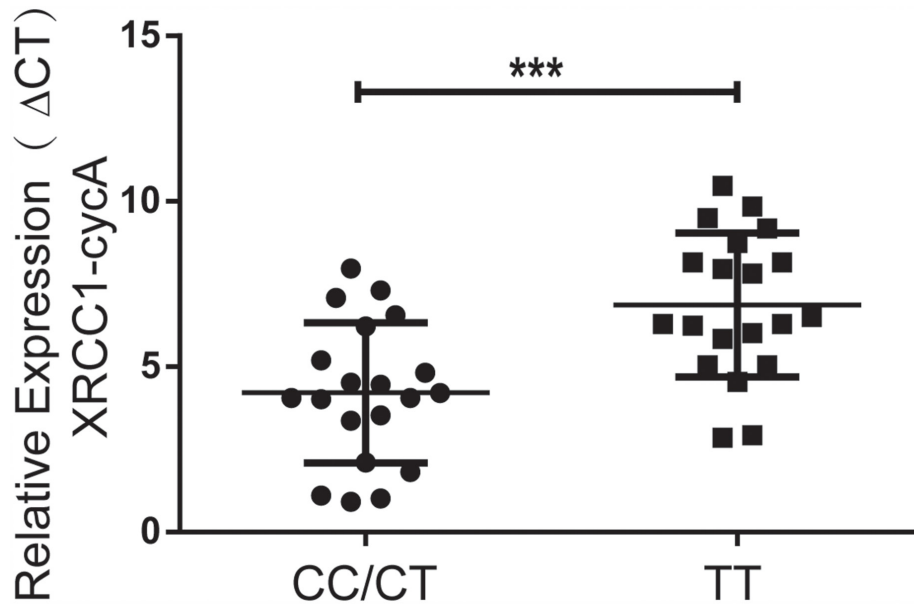

Supplementary Figure 1: Expression of XRCC1 were detected in cervical cancer patients carrying with the XRCC1 rs3213245 genotypes. \*\*\*: P<0.0001.
